# Supplementary material for: Blood culture surveillance in a secondary care hospital in Benin: epidemiology of bloodstream infection pathogens and antimicrobial resistance
Source: Springer Nature journal article supplement (doi:10.1186/s12879-022-07077-z), 2022-02-03
Supplement: MOESM1 [file 20097928]

Additional files

**Additional File 1: local laboratory work-up of blood cultures**

Upon receipt in the laboratory, blood culture bottles (BCB) were incubated in a standard incubator (as opposed to a blood culture automate) and visually inspected twice daily for signs of growth, both in the broth (turbidity, hemolysis, gas formation) and by detecting colour change of the chromogenic CO<sub>2</sub> indicator at the bottom of the BCB. Upon signs of growth, a Gram stain was performed and a subculture on blood, chocolate and/or MacConkey agar was done, depending on result of the Gram stain. From September 2018 onwards, bottles were weighed upon reception at the laboratory with a Kern pocket balance (Kern & Sohn GmbH, Balingen, Germany) to determine sampled blood volume (see below). End of February 2019, a blind subculture (regardless of visual signs of growth) on day 1 of incubation (*i.e.* after one overnight incubation) of all BCB was implemented.

On-site identification and antibiotic susceptibility testing (AST) of bacteria was done using conventional phenotypic testing with use of Oxoid agar bases (ThermoFisher Scientific, Waltham, USA) and DiaTabs (Rosco Diagnostica, Taastrup, Denmark). Antibiotic susceptibility testing (AST) was performed by disk diffusion method, using Neo-Sensitabs (Rosco Diagnostica). Disk diffusion breakpoints by the Clinical & Laboratory Standards Institute (CLSI) were used and yearly updated to the latest version. When requested by the physician, a thick blood film (Giemsa stain) was assessed. Laboratory staff was well trained and participated to national quality assessment programs.

Additional files

### **Additional File 2: reference isolate testing in Belgium**

Upon arrival in Belgium, the isolates were identified using matrix-assisted laser desorption/ionization time-of-flight mass spectrometry (MALDI-TOF MS), using a Microflex™ device (Bruker Daltonics, Massasuchetts, USA) with MALDI Biotyper® software (MBT 7854 MSP Library) at the University Hospitals Leuven. *Salmonella* antisera of Pro-lab diagnostics (Richmond Hill, Canada) were used to serotype *Salmonella* isolates. *Salmonella* isolates that could not be serotyped with certainty were submitted for reference identification by the Belgian national reference laboratory for *Salmonella* (Scientific Service of Human Bacterial Diseases, Scientific Direction of Human Infectious Diseases, Sciensano, Brussels). Optochin disks (Rosco Diagnostica) were used to differentiate *Streptococcus pneumoniae* from other viridans *Streptococcus* species, after MALDI-TOF identification.

Antibiotics for which only Minimal Inhibitory Concentration (MIC) breakpoints were determined by CLSI were tested using E-tests® (bioMérieux). For azithromycin susceptibility testing in *Salmonella* Typhi, CLSI breakpoints were used for both disk diffusion ( $\geq 13$  mm susceptible;  $\leq 12$  mm resistant) and MIC testing by E-tests (MIC  $\leq 16$  µg/mL susceptible). Vancomycin E-tests were performed for *Staphylococcus aureus* and when vancomycin disk was  $< 17$  mm for *Enterococcus* species (to confirm vancomycin-resistant *Enterococcus*). Inducible resistance to clindamycin was tested for in *Staphylococcus aureus* isolates by performing D-test.

Quality control was performed each day of AST with the following American Type Culture Collection (ATCC) strains and strains obtained as part of external quality control programs from Sciensano: ATCC 25922 (*Escherichia coli*), ATCC 27853 (*Pseudomonas aeruginosa*), ATCC 25923 (*Staphylococcus aureus*; disks) and ATCC 29213 (*S. aureus*, E-test vancomycin). Carbapenemase and ESBL testing quality control was done with following reference strains: ATCC 700603 *Klebsiella pneumoniae* (ESBL), M/11720 *Klebsiella pneumoniae* (KPC), M/11721 *Klebsiella pneumoniae* (OXA48), ATCC BAA-2146 *Klebsiella pneumoniae* (MBL).

Additional files

**Additional table 1:** Antibiotics tested for each of the pathogens, with disk diffusion (Neo-Sensitabs, Rosco Diagnostica) or E-test® (bioMérieux), as part of reference testing

| Antibiotic & dose                           | <i>Staphylococcus aureus</i> | <i>Enterococcus</i> species | Enterobacterales (except <i>Salmonella</i> ) | <i>Salmonella enterica</i> | <i>Pseudomonas aeruginosa</i> | <i>Acinetobacter</i> species | <i>Burkholderia cepacia</i> | <i>Stenotrophomonas maltophilia</i> |
|---------------------------------------------|------------------------------|-----------------------------|----------------------------------------------|----------------------------|-------------------------------|------------------------------|-----------------------------|-------------------------------------|
| Disk diffusion                              |                              |                             |                                              |                            |                               |                              |                             |                                     |
| Penicillin 10 µg                            | x                            |                             |                                              |                            |                               |                              |                             |                                     |
| Ampicillin 10 µg                            |                              | x                           | x                                            | x                          |                               |                              |                             |                                     |
| Amoxicillin-clavulanate 20/10 µg            |                              |                             | x                                            |                            |                               |                              |                             |                                     |
| Piperacillin-tazobactam 100/10 µg           |                              |                             | x                                            |                            | x                             |                              |                             |                                     |
| Temocillin 30 µg                            |                              |                             | x                                            |                            |                               |                              |                             |                                     |
| Cefoxitin 30 µg                             | x                            |                             | x                                            |                            |                               |                              |                             |                                     |
| Cefuroxime 30 µg                            |                              |                             | x                                            |                            |                               |                              |                             |                                     |
| Ceftriaxone 30 µg                           |                              |                             | x                                            | x                          |                               | x                            |                             |                                     |
| Ceftazidime 30 µg                           |                              |                             | x                                            | x                          | x                             | x                            | x                           |                                     |
| Meropenem 10 µg                             |                              |                             | x                                            |                            | x                             | x                            |                             |                                     |
| Gentamicin 10 µg                            | x                            |                             | x                                            |                            |                               | x                            |                             |                                     |
| Amikacin 30 µg                              | x                            |                             | x                                            |                            | x                             | x                            |                             |                                     |
| Ciprofloxacin 5 µg                          | x                            |                             | x                                            |                            | x                             | x                            |                             |                                     |
| Pefloxacin 5 µg                             |                              |                             |                                              | x                          |                               |                              |                             |                                     |
| Chloramphenicol 30 µg                       |                              |                             | x                                            | x                          |                               |                              |                             |                                     |
| Trimethoprim-sulfamethoxazole 1.25/23.75 µg | x                            |                             | x                                            | x                          |                               | x                            | x                           | x                                   |
| Clindamycin 2 µg                            | x                            |                             |                                              |                            |                               |                              |                             |                                     |
| Doxycycline 30 µg                           | x                            |                             |                                              |                            |                               | x                            |                             |                                     |
| Minocycline 30 µg                           |                              |                             |                                              |                            |                               |                              |                             | x                                   |

Additional files

|                    |   |   |   |   |  |   |   |  |
|--------------------|---|---|---|---|--|---|---|--|
| Tetracycline 30 µg |   |   | x | x |  | x |   |  |
| Erythromycin 15 µg | x |   |   |   |  |   |   |  |
| Linezolid 30 µg    | x | x |   |   |  |   |   |  |
| Vancomycin 30 µg   |   | x |   |   |  |   |   |  |
| E-tests            |   |   |   |   |  |   |   |  |
| Azithromycin       |   |   |   | x |  |   |   |  |
| Chloramphenicol    |   |   |   |   |  |   | x |  |
| Ciprofloxacin      |   |   |   | x |  |   |   |  |
| Vancomycin         | x |   |   |   |  |   |   |  |

Additional file 3: Blood culture request form used in Boko hospital

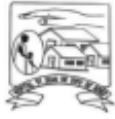

**FICHE DE DEMANDE HEMOCULTURE**

*Veillez utiliser une fiche par culture de sang*

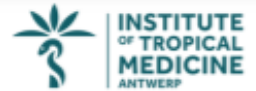

**Données démographiques**

Prénom : ..... Nom : .....

Date de naissance: \_\_\_\_ / \_\_\_\_ / \_\_\_\_\_ ou âge: ..... (jours/mois/ans)  
(DD/MM/YYYY)

N° d'hôpital : ..... Sexe : M  F

N° de téléphone : ..... Village : .....

Date d'admission: \_\_\_\_ / \_\_\_\_ / \_\_\_\_\_ Référé:  Oui  Non  
(DD/MM/YYYY)

Si référé, quelle facilité a référé : .....

**Indications pour hémoculture:**

1.  Fièvre (axillaire T° ≥ 38°C)  Hypothermie (axillaire T° ≤ 36°C)

2. Signes de gravité:

Hypotension  Fréquence respiratoire augmentée  Confusion

Suspicion d'une infection grave ou localisée:

Pneumonie

Infections des voies urinaires compliquées

Méningite

Abscess

Ostéomyélite

Infection de la peau ou tissus mous

Infection abdominal

Suspicion d'une autre infection grave:

Le paludisme grave

Autres: .....

Fièvre typhoïde

3.  Infection néonatale

Début des symptômes: \_\_\_\_ / \_\_\_\_ / \_\_\_\_\_ (DD/MM/YYYY)

**Traitement:**

Patient a pris des antibiotiques hier ou aujourd'hui :  OUI  NON

Type d'antibiotique (si connu): .....

Date de début de traitement antibiotique : .....

Patient a pris des anti-malariens:  YES  NO

Type de traitement anti-malarien (si connu): .....

**Résultats TDR de paludisme :**

Teste rapide de palu:  Pas fait  Négative  Positive

Nom de médecin : .....

Tel : ..... Signature: .....

*Veillez assurer que toutes les questions soient correctement remplies*

**Additional file 4: Laboratory work-up form used in Boko hospital**

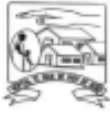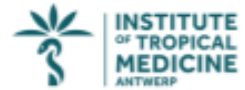

**FICHE LABORATOIRE POUR GESTION HEMOCULTURES**

*Veillez utiliser une fiche par flacon*

Date de réception: \_\_\_ / \_\_\_ / \_\_\_\_\_ (DD/MM/YYYY)

Heure de réception: \_\_ : \_\_ (hh:mm)

Flacon d'hémoculture:  Pédiatrique  Adulte

Poids de flacon d'hémoculture : Avant prélèvement : \_\_ , \_\_ g; Après : \_\_ , \_\_ g

|                                  |
|----------------------------------|
| Nom de patient:                  |
| Numéro de bouteille hémoculture: |

**Inspection quotidienne du flacon (mettez un « X » au moment de virage):**

| Jour 1  | Jour 2 |            | Jour 3 |            | Jour 4 | Jour 5 | Jour 6 | Jour 7 | Jour 8 |
|---------|--------|------------|--------|------------|--------|--------|--------|--------|--------|
|         | Matin  | Après-midi | Matin  | Après-midi |        |        |        |        |        |
| Virage? |        |            |        |            |        |        |        |        |        |

**Résultats de goutte épaisse:**

Goutte-épaisse:  Pas fait  Négative  Positive

Si positive, densité de parasites: ..... / $\mu$ l, *Plasmodium* species: .....

**Gestion des hémocultures poussées:**

Résultat coloration Gram: .....

Date: \_\_\_ / \_\_\_ / \_\_\_\_\_ (DD/MM/YYYY)

Résultat Gram communiqué au clinicien:  Oui  Non

Communiqué par (initiales) : ..... à .....

Résultats de cultures sur gélose et résultats identification:

**Identification définitive:** .....

Effectué par (initiales) : ..... Date : \_\_\_ / \_\_\_ / \_\_\_\_\_ (DD/MM/YYYY)

Résultats identification téléphoné au clinicien :  Oui  Non

**Additional File 5: Comparison between patient population in Boko hospital and CHUD Parakou**

|                                                            | <b>Boko hospital</b>  | <b>CHUD Parakou</b>  | <b>p-value for difference</b> |
|------------------------------------------------------------|-----------------------|----------------------|-------------------------------|
| <b>Total number of patients</b>                            | 2676 (88.3% of total) | 356 (11.7% of total) | -                             |
| <b>Total number of suspected BSI episodes</b>              | 2724 (88.4% of total) | 358 (11.6% of total) | -                             |
| <b>Median age of patients</b>                              | 2                     | 3                    | p < 0.001                     |
| <b>Percentage female</b>                                   | 44.9%<br>(1167/2599)  | 42.3%<br>(119/281)   | p = 0.39                      |
| <b>Antibiotic treatment before culture</b>                 | 20.5%<br>(550/2683)   | 37.9%<br>(134/354)   | p < 0.001                     |
| <b>Healthcare-associated infection</b>                     | 9.2%<br>(250/2717)    | 19.0%<br>(68/358)    | p < 0.001                     |
| <b>Pathogen rate of suspected episodes</b>                 | 11.4%<br>(311/2724)   | 19.6%<br>(70/358)    | p < 0.001                     |
| <b>Contamination rate</b>                                  | 17.0%<br>(499/2943)   | 16.1%<br>(66/410)    | p = 0.72                      |
| <b>Thick blood film positive (malaria diagnosis)</b>       | 54.8%<br>(1244/2270)  | 7.2%<br>(11/418)     | p < 0.001                     |
| <b>Thick blood film positive in confirmed BSI episodes</b> | 45.9%<br>(100/218)    | 3.0%<br>(1/33)       | P < 0.001                     |

CHUD = Centre Hospitalier Universitaire Departemental. BSI = bloodstream infection

**Additional File 6** : all pathogens identified from October 2016 – March 2020, in alphabetical order, as confirmed by MALDI-TOF spectrometry.

| <b>Species</b>                      | <b>Number of isolates</b> |
|-------------------------------------|---------------------------|
| <i>Achromobacter</i> species        | 1                         |
| <i>Achromobacter xylosoxidans</i>   | 1                         |
| <i>Acinetobacter baumannii</i>      | 10                        |
| <i>Acinetobacter</i> species        | 3                         |
| <i>Aerococcus viridans</i>          | 5                         |
| <i>Brevundimonas diminuta</i>       | 1                         |
| <i>Burkholderia cepacia</i>         | 14                        |
| <i>Burkholderia pseudomallei</i>    | 1                         |
| <i>Candida lusitaniae</i>           | 1                         |
| <i>Candida parapsilosis</i>         | 1                         |
| <i>Candida tropicalis</i>           | 1                         |
| <i>Elizabethkingia anophelis</i>    | 1                         |
| <i>Enterobacter cloacae</i>         | 44                        |
| <i>Enterococcus casseliflavus</i>   | 2                         |
| <i>Enterococcus faecalis</i>        | 4                         |
| <i>Enterococcus faecium</i>         | 8                         |
| <i>Enterococcus gallinarum</i>      | 1                         |
| <i>Escherichia coli</i>             | 45                        |
| <i>Klebsiella oxytoca</i>           | 2                         |
| <i>Klebsiella pneumoniae</i>        | 53                        |
| <i>Lactococcus lactis</i>           | 2                         |
| <i>Leclercia adecarboxylata</i>     | 1                         |
| <i>Moraxella osloensis</i>          | 1                         |
| <i>Moraxella</i> species            | 1                         |
| <i>Ochrobactrum anthropi</i>        | 1                         |
| <i>Ochrobactrum</i> species         | 1                         |
| <i>Pantoea dispersa</i>             | 1                         |
| <i>Proteus mirabilis</i>            | 2                         |
| <i>Pseudomonas aeruginosa</i>       | 5                         |
| <i>Pseudomonas stutzeri</i>         | 1                         |
| <i>Salmonella</i> Enteritidis       | 8                         |
| <i>Salmonella</i> Herston           | 1                         |
| <i>Salmonella</i> Typhi             | 52                        |
| <i>Salmonella</i> Typhimurium       | 5                         |
| <i>Staphylococcus aureus</i>        | 46                        |
| <i>Stenotrophomonas maltophilia</i> | 2                         |
| <i>Streptococcus agalactiae</i>     | 1                         |
| <i>Streptococcus gallolyticus</i>   | 1                         |
| <i>Streptococcus mitis/oralis</i>   | 2                         |
| <i>Streptococcus parasanguinis</i>  | 2                         |
| <i>Streptococcus pyogenes</i>       | 1                         |
| <i>Weissella confusa</i>            | 2                         |



**Additional File 7: blood volume sampled**

Blood volume sampled per bottle, shown in boxplots and stratified by age, as measured in 2248 of 3353 blood culture bottles (BCB). Volume calculation was based on difference between filled bottle weight and bottle weight before filling. The solid line in the box represents the median volume, the “X” indicates the mean volume. Volume is indicated on the Y-axis in mL.

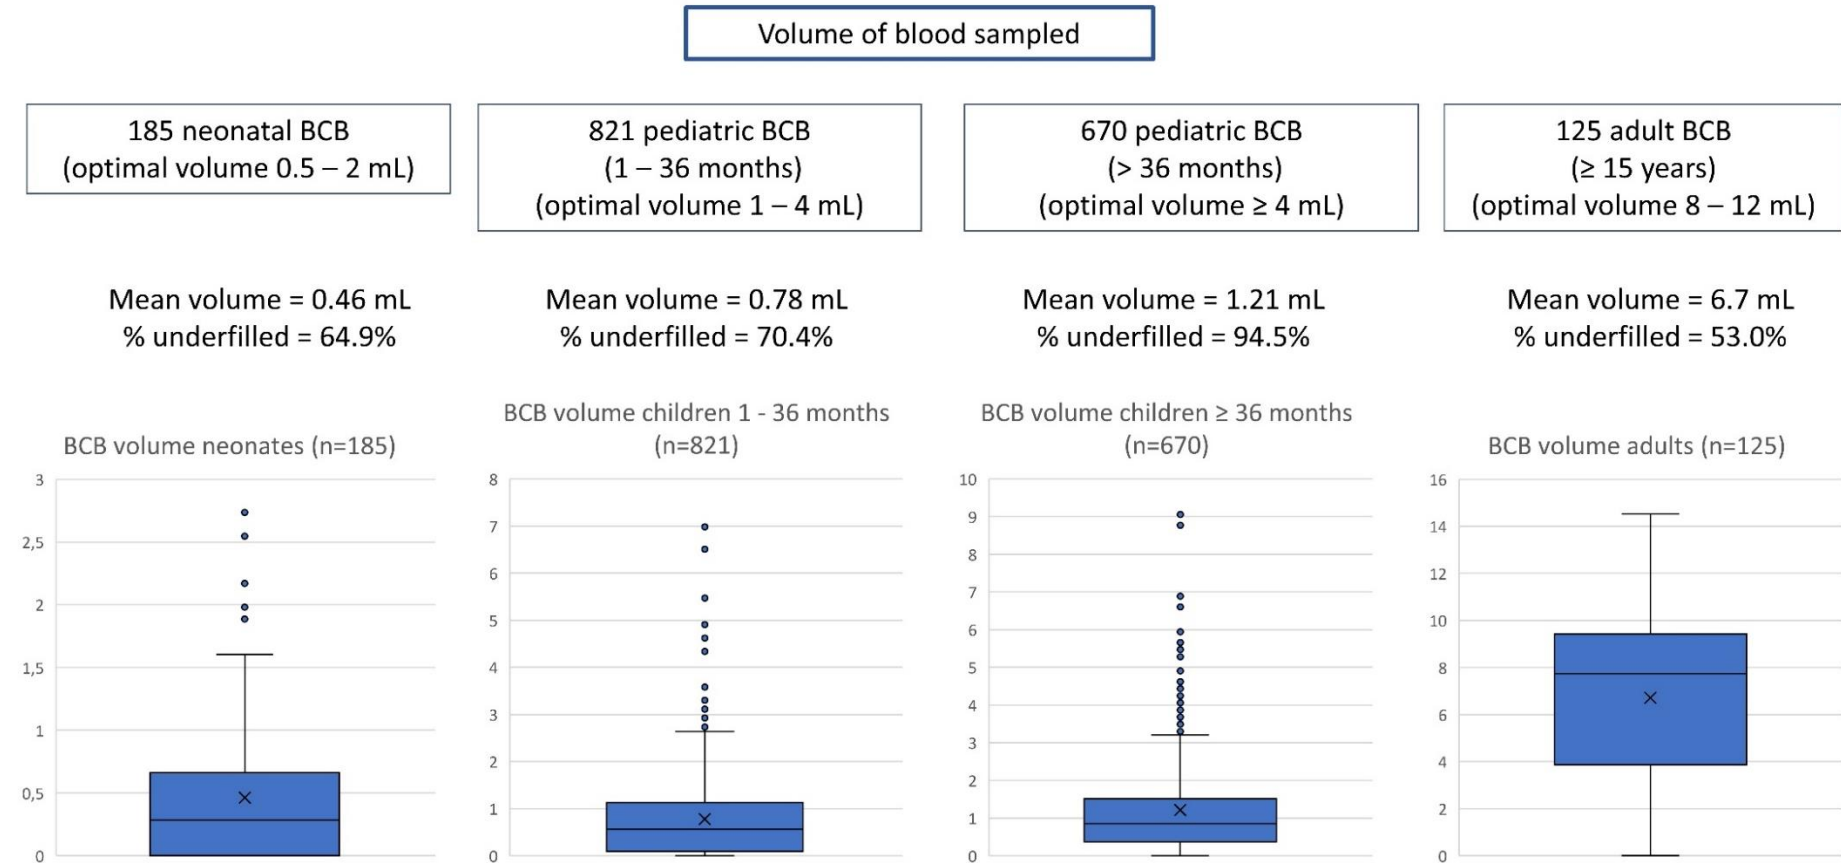

Abbreviations: BCB = blood culture bottle

**Additional File 8:** Association of presumed focus of infection (*i.e.*, as recorded on the blood culture laboratory request form at the moment of sampling) with pathogen growth rate. Generalized infection: no localized infection indicated. The p-value reflects the statistical significance of the difference in pathogen rate between generalized infections (no focus) and the possible foci of infection.

| Blood culture result               | Presumed focus of infection |           |           |            |             |                 |
|------------------------------------|-----------------------------|-----------|-----------|------------|-------------|-----------------|
|                                    | Generalized*                | Abdominal | CNS       | Purulent** | Respiratory | Urinary/genital |
| Growth of pathogen                 | 284 (12.2%)                 | 3 (7.5%)  | 6 (12.2%) | 12 (18.2%) | 27 (12.5%)  | 6 (16.7%)       |
| No growth or growth of contaminant | 2049                        | 37        | 43        | 54         | 189         | 30              |
| Total                              | 2333                        | 40        | 49        | 66         | 216         | 36              |
| p-value                            | -                           | 0.367     | 0.998     | 0.154      | 0.918       | 0.427           |

\* No localized infection indicated on request form

\*\* Suspicion of skin/soft tissue infection, osteomyelitis or abscess as indicated on the request form

Abbreviations: CNS = central nervous system.
